# Supplementary material
Source: HighWire-hosted journal article supplement (https://gut.bmj.com/content/71/8/1551)
Supplement: inline-supplementary-material-4 [file inline-supplementary-material-4.pdf]

Supplementary Figure 1

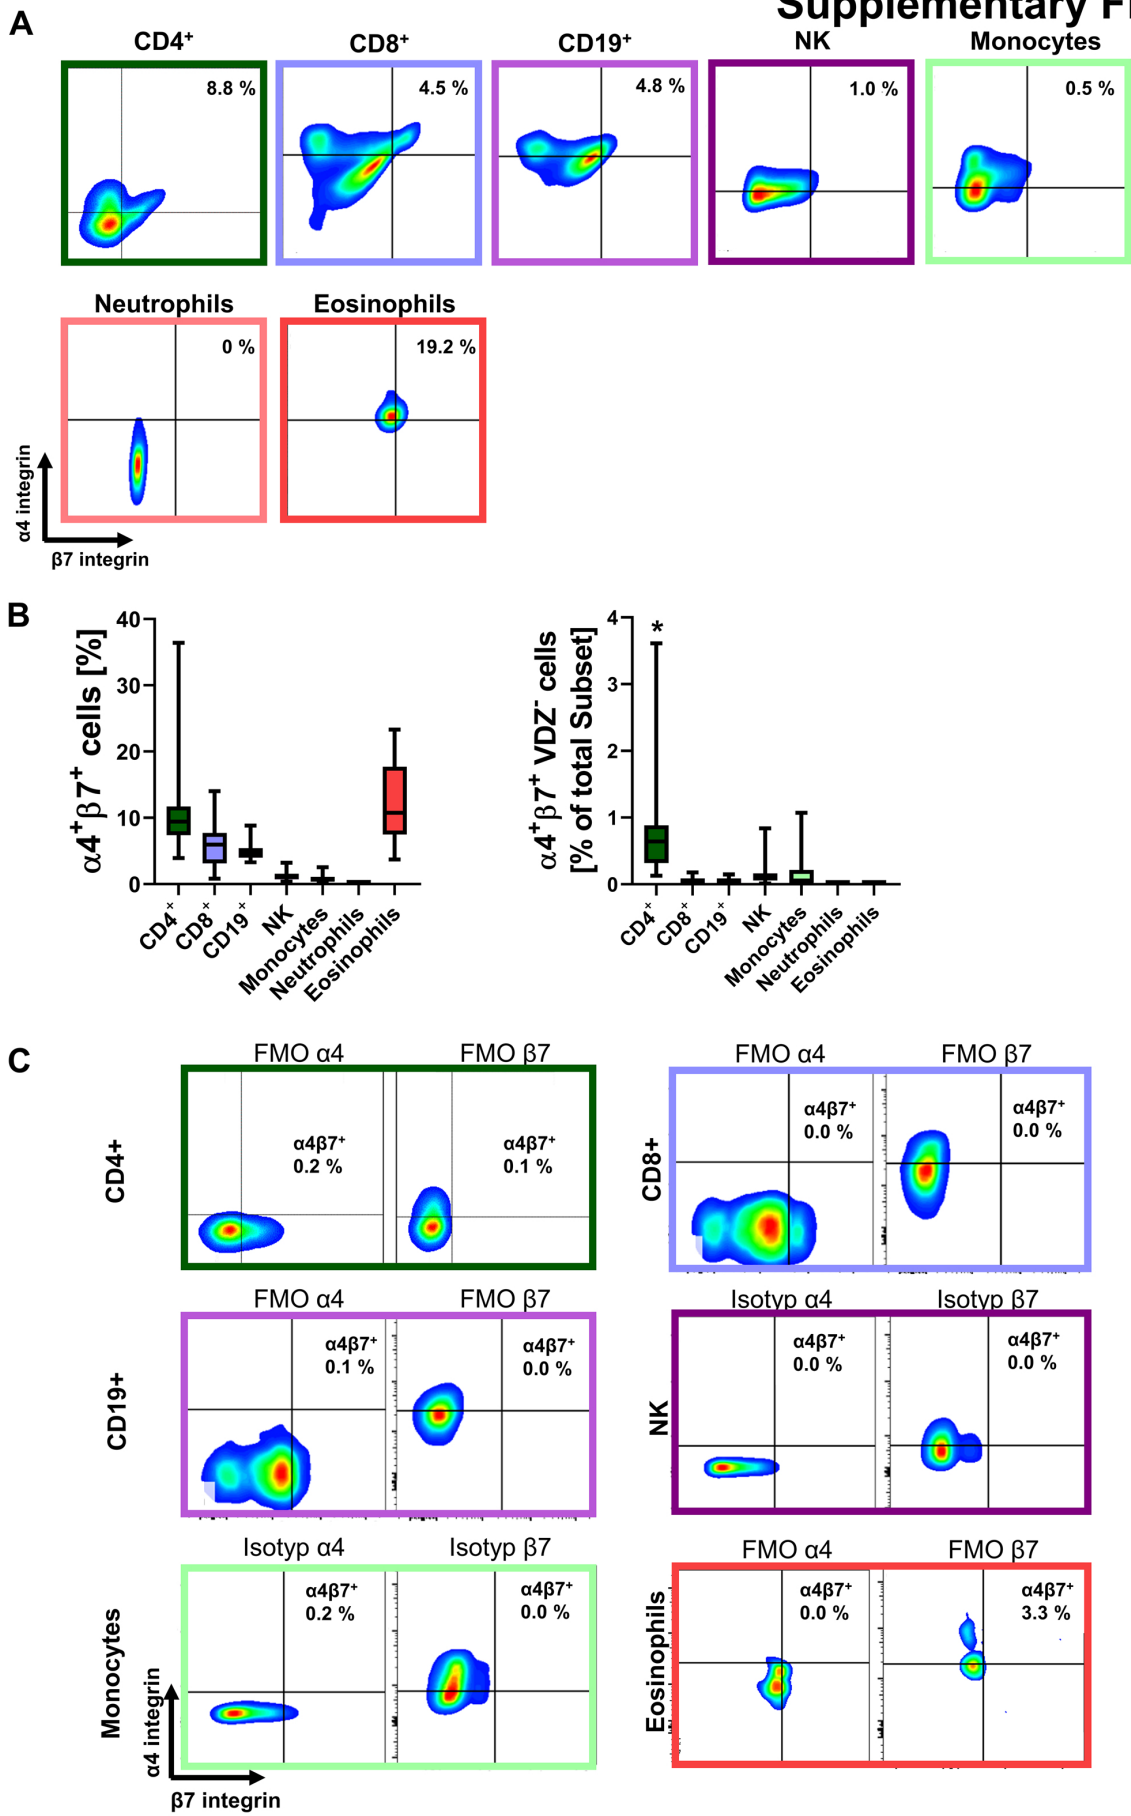

### **Supplementary Figure 1: $\alpha 4\beta 7$ -expression on and vedolizumab binding to different leukocyte subsets**

**(A,B)** Representative (A) and quantitative (B) flow cytometry of  $\alpha 4\beta 7^+$  cells within  $CD4^+$ ,  $CD3^+CD8^+$ ,  $CD3^+CD19^+$ ,  $CD3^+CD56^+CD16^+$  NK cells,  $CD3^+CD16^+CD14^+$  monocytes,  $CD16^+$  neutrophils and  $CD16^-CCR3^+Siglec8^+$  eosinophils (left panel) and quantification of  $\alpha 4\beta 7^+VDZ^-$  cells after incubation with 10  $\mu g/ml$  VDZ.  $n = 6-53$  IBD patients or healthy controls per group as indicated.

Statistical comparisons were performed using One-Way-Anova with Tukey's multiple comparisons post-hoc test

**(C)** Representative flow cytometry of controls for  $\alpha 4^+$  and  $\beta 7^+$  cells in the different leukocyte subsets shown in A and B.

Sample donor characteristics are listed in *Supplementary Table S12*.
