# Supplementary material
Source: HighWire-hosted journal article supplement (https://gut.bmj.com/content/71/8/1551)
Supplement: inline-supplementary-material-6 [file inline-supplementary-material-6.pdf]

Supplementary Figure 2

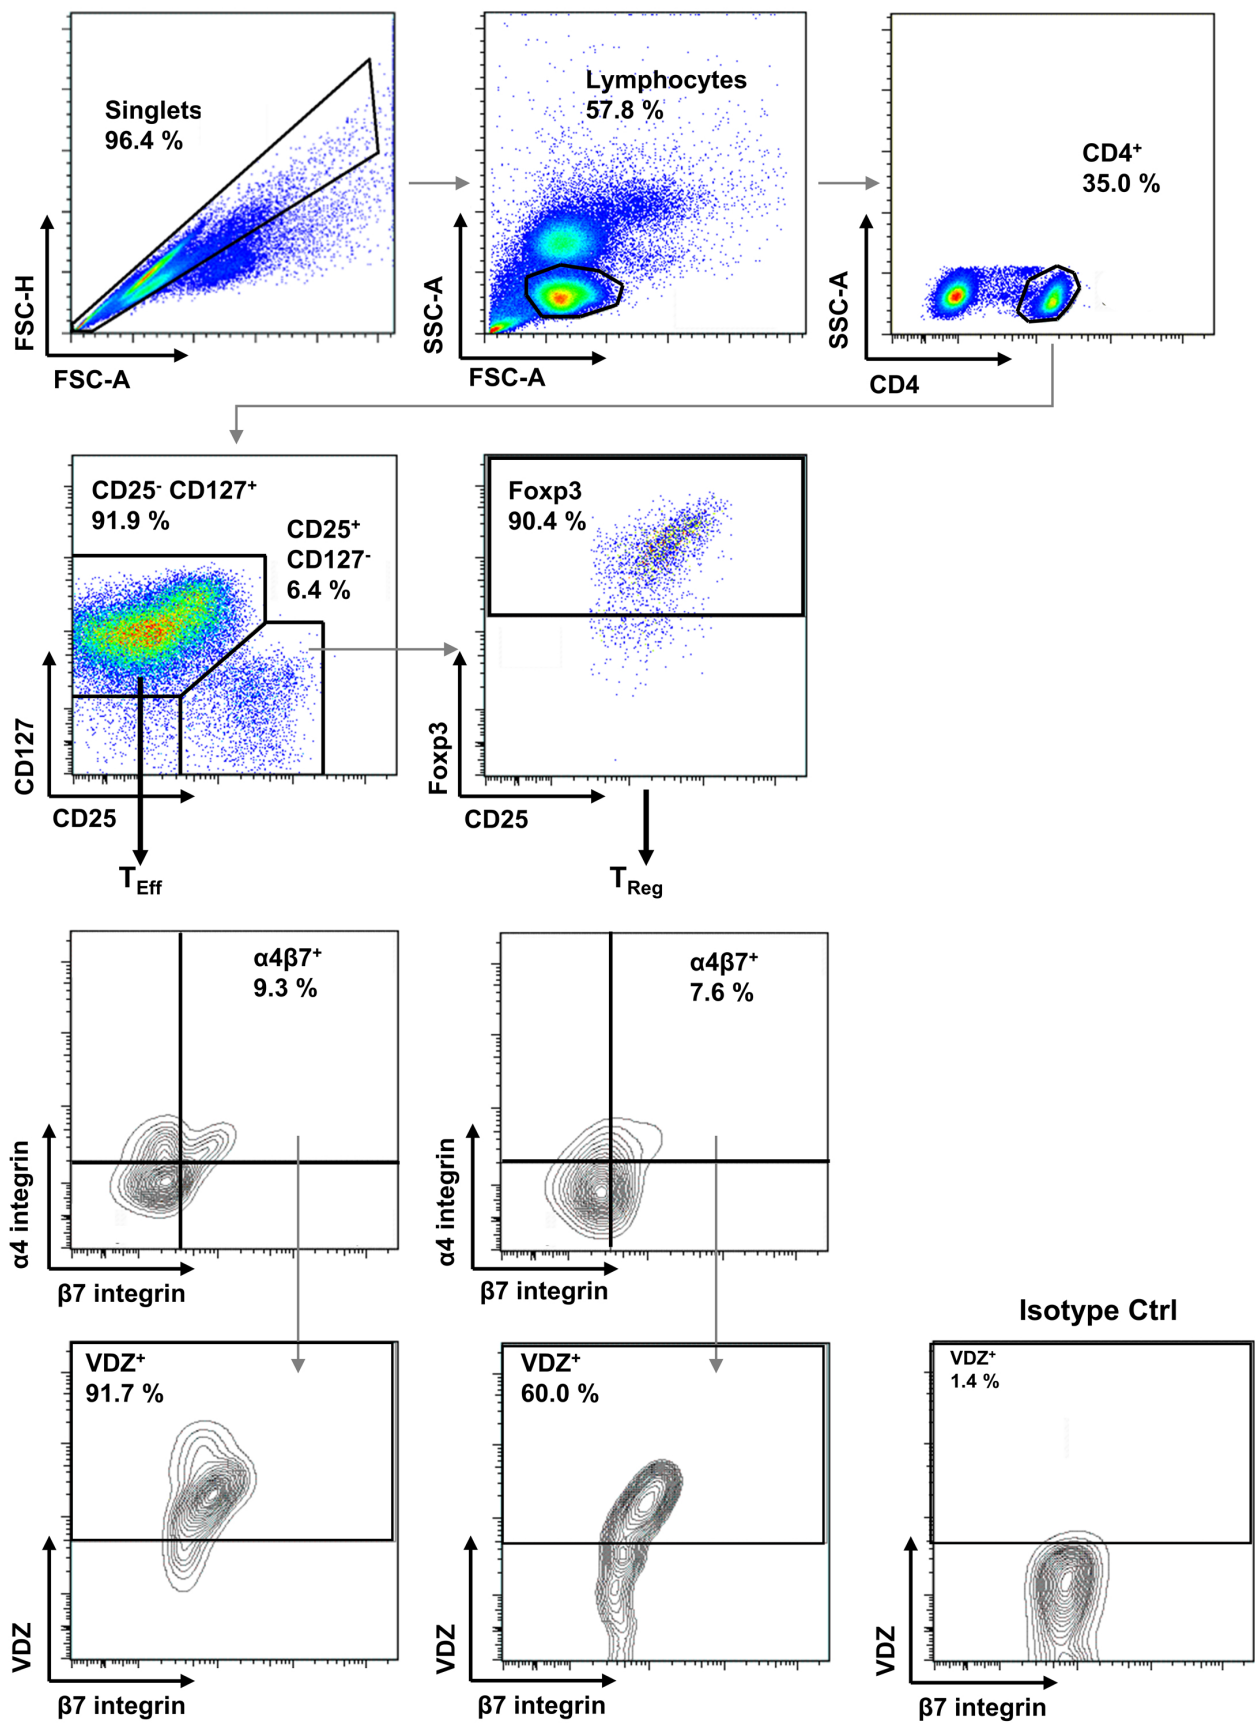

**Supplementary Figure 2: Representative gating of CD4<sup>+</sup>α4β7<sup>+</sup>VDZ<sup>+</sup> T<sub>Reg</sub> and T<sub>Eff</sub> cells.**

Following doublet exclusion and gating on vital lymphocytes based on forward and sideward scatter, we selected CD4<sup>+</sup> T cells and defined T<sub>Reg</sub> cells as CD25<sup>+</sup>CD127<sup>low</sup>Foxp3<sup>+</sup> and T<sub>Eff</sub> cells as CD25<sup>-</sup>CD127<sup>high</sup>. Next we gated on α4β7<sup>+</sup> cells and determined VDZ<sup>+</sup> cells in this subset.
