# Supplementary material
Source: HighWire-hosted journal article supplement (https://gut.bmj.com/content/71/8/1551)
Supplement: inline-supplementary-material-7 [file inline-supplementary-material-7.pdf]

## Supplementary Figure 3

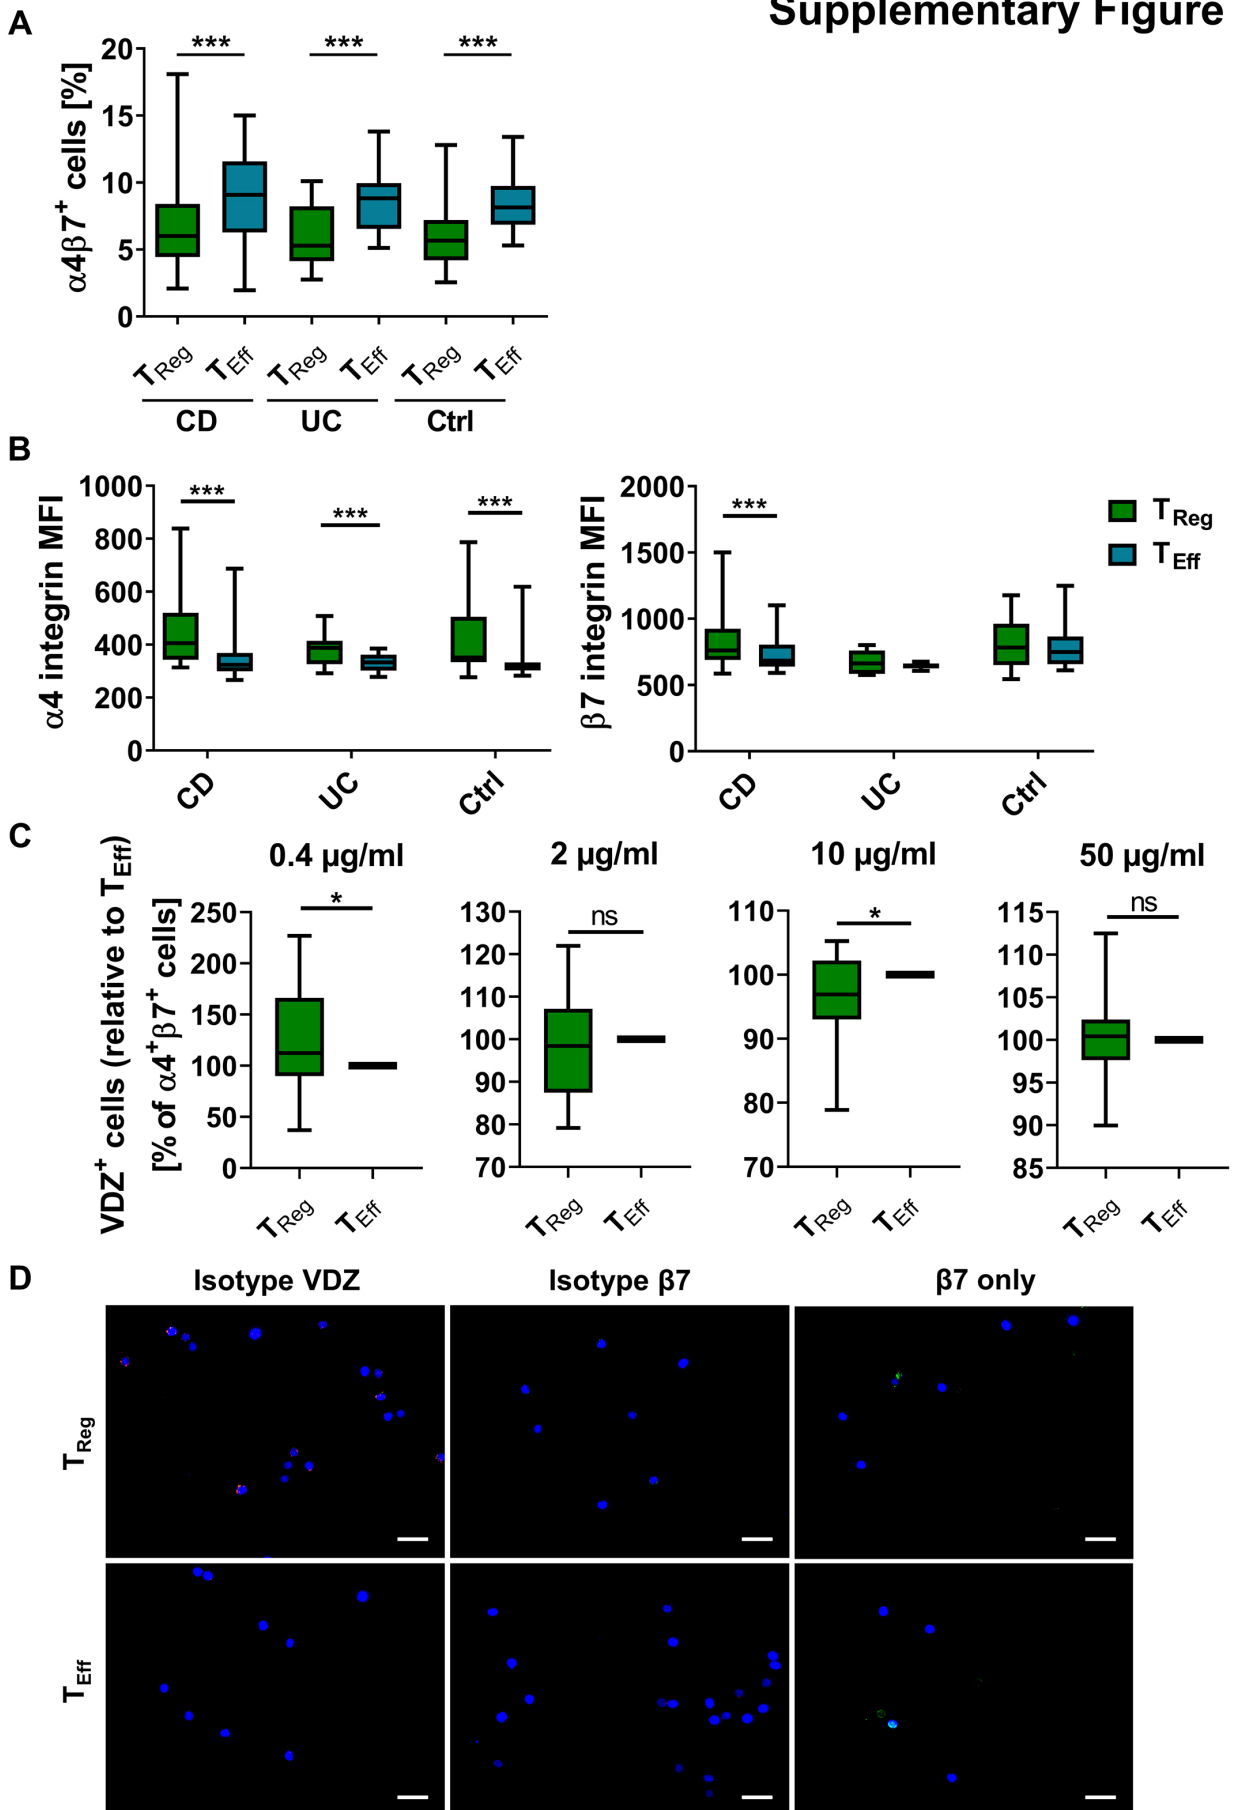

**Supplementary Figure 3:  $\alpha 4$  and  $\beta 7$  integrin expression on T<sub>Reg</sub> and T<sub>Eff</sub> cells, vedolizumab binding to memory CD4<sup>+</sup> T cells and controls for VDZ binding.**

**(A)** Quantitative flow cytometry of  $\alpha 4^+ \beta 7^+$  T<sub>Reg</sub> and T<sub>Eff</sub> cells in patients with UC and CD compared with healthy controls. n = 17-28 IBD patients or healthy controls as indicated.

**(B)** Mean fluorescence intensity (MFI) of  $\alpha 4$  and  $\beta 7$  integrin on T<sub>Reg</sub> and T<sub>Eff</sub> cells in patients with UC and CD and in healthy controls. n = 17-28 IBD patients or healthy controls as indicated.

**(C)** Quantitative flow cytometry of VDZ<sup>+</sup> cells after gating on  $\alpha 4 \beta 7^+$  CD45RO<sup>+</sup> T<sub>Reg</sub> and T<sub>Eff</sub> cells following incubation with the indicated concentrations of fluorescently labelled vedolizumab. Quantitative data are expressed relative to T<sub>Eff</sub> cells. n = 25 IBD patients and healthy controls.

**(D)** Representative fluorescence microscopy of FACS-purified T<sub>Reg</sub> and T<sub>Eff</sub> cells stained with isotype controls for  $\beta 7$  antibody (green) and VDZ (red) and counterstained with Hoechst (blue); Scale bar 10  $\mu$ m. Representative images from 1 out of 6 independent experiments (cells purified from leukocyte cones).

Statistical comparisons were performed using paired t-test (A, C), 2way ANOVA with Sidak's multiple comparison test (B)

Sample donor characteristics are listed in *Supplementary Table S13*.
