# Supplementary material
Source: HighWire-hosted journal article supplement (https://gut.bmj.com/content/71/8/1551)
Supplement: inline-supplementary-material-8 [file inline-supplementary-material-8.pdf]

Supplementary Table 13: Patient information for Supplementary Figure 3

|                                 |                            | CON        | CD         | UC         |
|---------------------------------|----------------------------|------------|------------|------------|
| <b>Number</b>                   |                            | 10         | 11         | 6          |
| <b>Age (Ø, range)</b>           |                            | 28 (22-36) | 40 (25-60) | 46 (23-72) |
| <b>Female [%]</b>               |                            | 50.0       | 63.6       | 50.0       |
| <b>HBI (Ø, range)</b>           |                            |            | 4.6 (0-10) |            |
| <b>Mayo c.s. (Ø, range)</b>     |                            |            |            | 1.4 (0-3)  |
| <b>Therapy [%]</b>              | <i>Aminosalisylates</i>    |            | 9.1        | 16.7       |
|                                 | <i>Steroids</i>            |            | 0.0        | 16.7       |
|                                 | <i>Immunosuppressants</i>  |            | 0.0        | 0.0        |
|                                 | <i>Anti-TNF antibodies</i> |            | 90.9       | 83.3       |
|                                 | <i>Vedolizumab</i>         |            | 0.0        | 0.0        |
|                                 | <i>Ustekinumab</i>         |            | 9.1        | 0.0        |
| <b>Disease localization [%]</b> |                            |            | L1: 0.0    | E1: 0.0    |
|                                 |                            |            | L2: 0.0    | E2: 33.3   |
|                                 |                            |            | L3: 81.8   | E3: 66.7   |
|                                 |                            |            | L4: 0.0    |            |
|                                 |                            |            | L4+: 18.2  |            |
