# Supplementary material
Source: HighWire-hosted journal article supplement (https://gut.bmj.com/content/71/8/1551)
Supplement: inline-supplementary-material-11 [file inline-supplementary-material-11.pdf]

**Supplementary Table 14: Patient information for Supplementary Figure 4**

|                        | <b>CON</b> |
|------------------------|------------|
| <b>Number Patients</b> | 23         |
| <b>Number Samples</b>  | 28         |
| <b>Age (Ø, range)</b>  | 32 (19-44) |
| <b>Female [%]</b>      | 85.7       |
