# Supplementary material
Source: HighWire-hosted journal article supplement (https://gut.bmj.com/content/71/8/1551)
Supplement: inline-supplementary-material-17 [file inline-supplementary-material-17.pdf]

Supplementary Figure 7

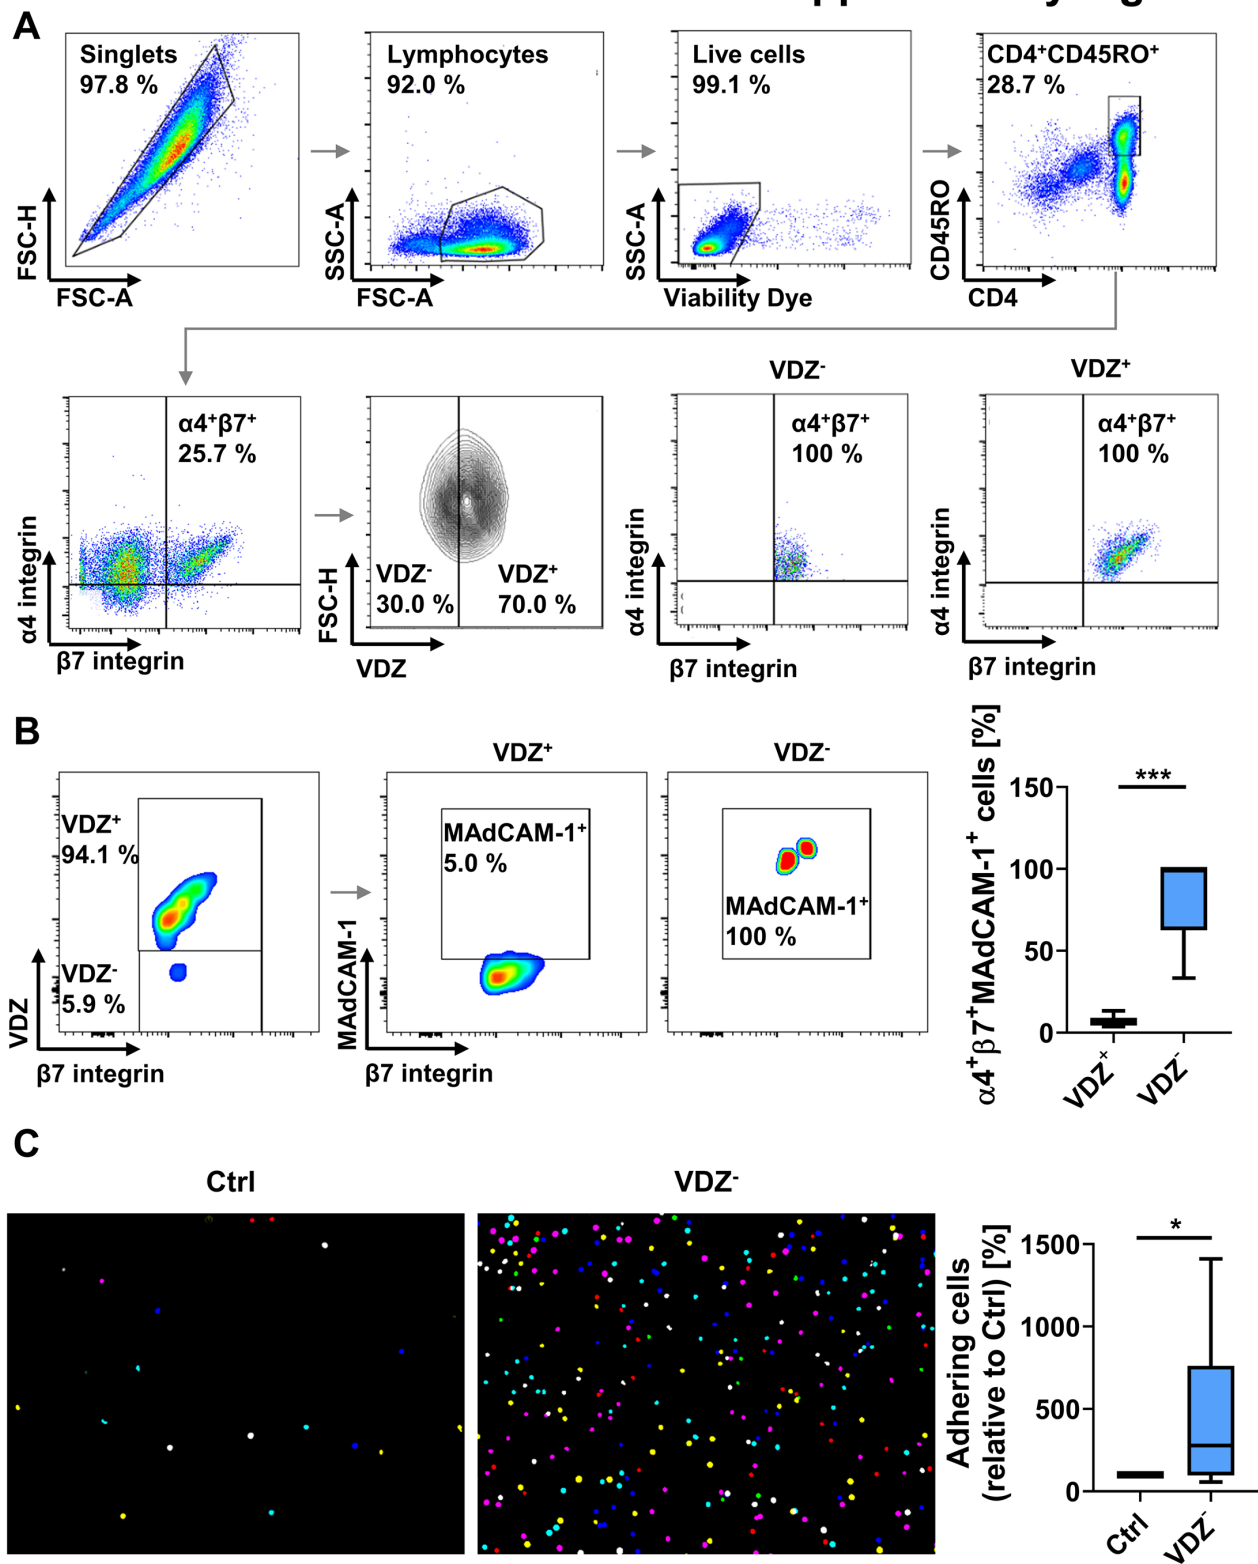

**Supplementary Figure 7: Quality control of FACS-isolated CD4<sup>+</sup>CD45RO<sup>+</sup>α4<sup>+</sup>β7<sup>+</sup> VDZ<sup>+</sup> and VDZ<sup>-</sup> cells.**

**(A)** Representative gating strategy and subsequent re-analysis. Cells were defined as CD4<sup>+</sup>CD45RO<sup>+</sup>α4<sup>+</sup>β7<sup>+</sup>VDZ<sup>+</sup> and CD4<sup>+</sup>CD45RO<sup>+</sup>α4<sup>+</sup>β7<sup>+</sup>VDZ<sup>-</sup> cells.

**(B)** Representative (left) and quantitative (right) flow cytometry of α4<sup>+</sup>β7<sup>+</sup>VDZ<sup>+</sup>MAdCAM<sup>+</sup> and α4<sup>+</sup>β7<sup>+</sup>VDZ<sup>-</sup>MAdCAM<sup>+</sup> T<sub>Reg</sub> cells incubated with different concentrations of fluorescently labelled VDZ and subsequently with fluorescently labelled MAdCAM-1. n = 8 healthy donors.

**(C)** Dynamic cell adhesion assays with VDZ<sup>-</sup> cells. Left panels: Representative microscopic images of adhering cells (overlay of 8 counted high-power fields). Right panels: Quantification of adhering cells relative to Ctrl. n = 9 (cells purified from leukocyte cones).

Statistical comparisons were performed using paired t-test (B) and Student's t-test (C).
