# Supplementary material
Source: HighWire-hosted journal article supplement (https://gut.bmj.com/content/71/8/1551)
Supplement: inline-supplementary-material-18 [file inline-supplementary-material-18.pdf]

# Supplementary Figure 8

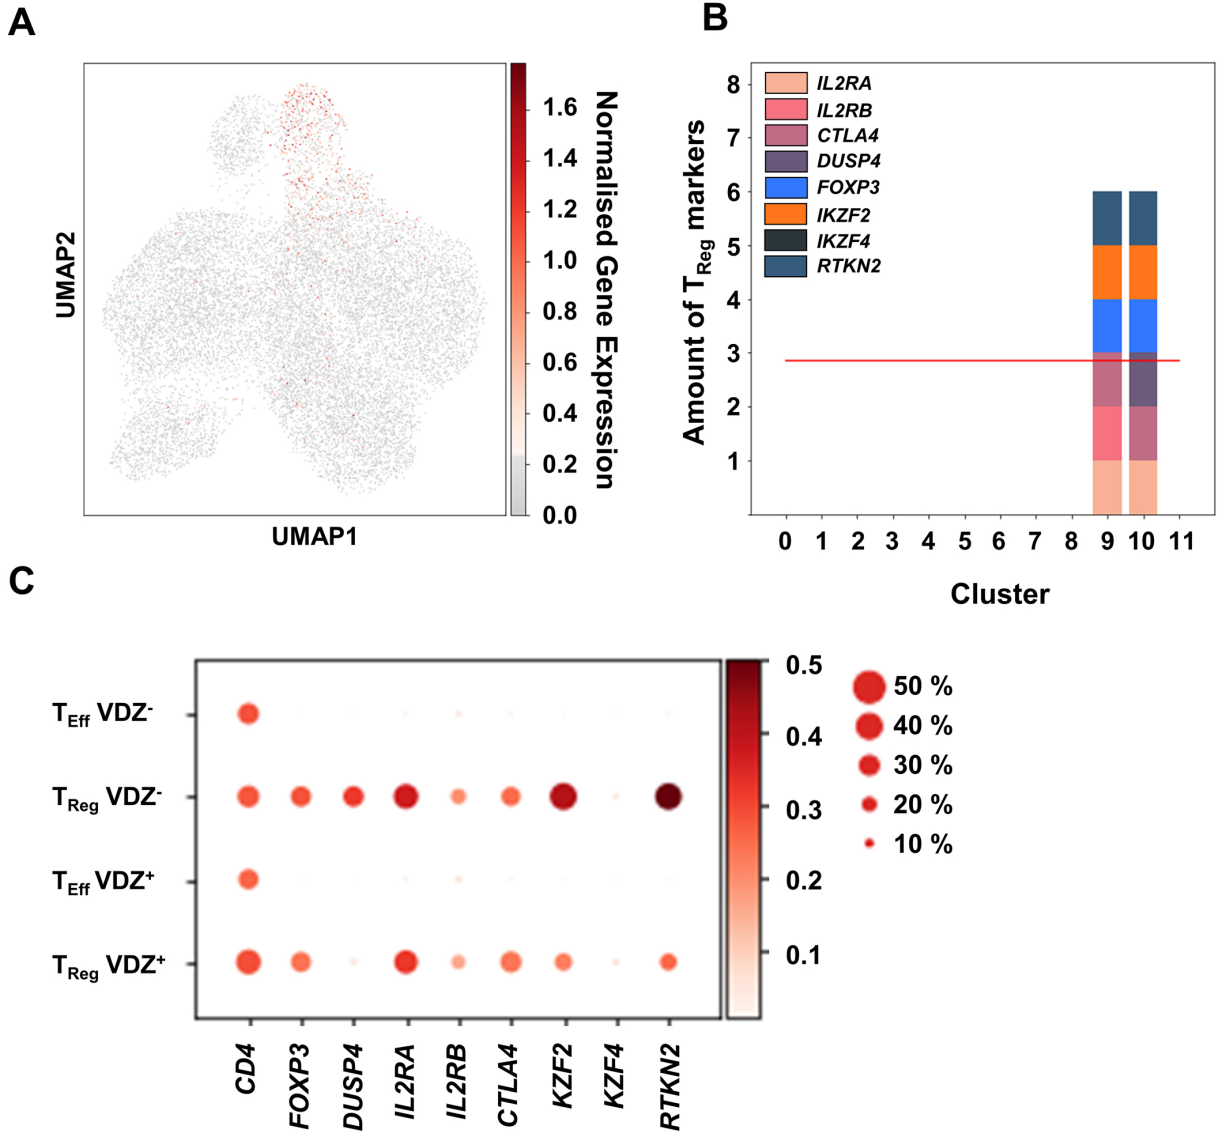

**Supplementary Figure 8: Characterisation of T<sub>Reg</sub> cell subclusters in single cell RNA sequencing analysis.**

**(A)** UMAP plot showing cells expressing *FOXP3*.

**(B)** Identification of subcluster 9 and 10 as T<sub>Reg</sub> cell clusters based on the expression of 8 different marker genes for T<sub>Reg</sub> cells.

**(C)** Heat map showing differential gene expression and portion of cells expressing eight prominent T<sub>Reg</sub> cell marker genes in VDZ<sup>-</sup> and VDZ<sup>+</sup> T<sub>Reg</sub> and T<sub>Eff</sub> cells.
