# Supplementary material
Source: HighWire-hosted journal article supplement (https://gut.bmj.com/content/71/8/1551)
Supplement: inline-supplementary-material-20 [file inline-supplementary-material-20.pdf]

Supplementary Table 6: Patient information for Figure 6 A-C

|                 |            |
|-----------------|------------|
|                 | CON        |
| Number Patients | 16         |
| Age (Ø, range)  | 28 (20-44) |
| Female [%]      | 76.5       |
