# Supplementary material
Source: HighWire-hosted journal article supplement (https://gut.bmj.com/content/71/8/1551)
Supplement: inline-supplementary-material-23 [file inline-supplementary-material-23.pdf]

Supplementary Table 15: Patient information for Supplementary Figure 9

|                                 |                            | CD         | UC         |
|---------------------------------|----------------------------|------------|------------|
| <b>Number</b>                   |                            | 5          | 6          |
| <b>Age (Ø, range)</b>           |                            | 35 (25-60) | 38 (25-44) |
| <b>Female [%]</b>               |                            | 40.0       | 66.7       |
| <b>HBI (Ø, range)</b>           |                            | 2.8 (0-7)  |            |
| <b>Mayo c.s. (Ø, range)</b>     |                            |            | 1.3 (0-2)  |
| <b>Therapy [%]</b>              | <i>Aminosalisylates</i>    | 20.0       | 100.0      |
|                                 | <i>Steroids</i>            | 40.0       | 33.3       |
|                                 | <i>Immunosuppressants</i>  | 0.0        | 0.0        |
|                                 | <i>Anti-TNF antibodies</i> | 80.0       | 66.7       |
|                                 | <i>Vedolizumab</i>         | 0.0        | 0.0        |
|                                 | <i>Ustekinumab</i>         | 20.0       | 33.3       |
| <b>Disease localization [%]</b> |                            | L1: 40.0   | E1: 16.7   |
|                                 |                            | L2: 0.0    | E2: 0.0    |
|                                 |                            | L3: 20.0   | E3: 83.3   |
|                                 |                            | L4: 0.0    |            |
|                                 |                            | L4+: 40.0  |            |
