# Supplementary material
Source: HighWire-hosted journal article supplement (https://gut.bmj.com/content/71/8/1551)
Supplement: inline-supplementary-material-25 [file inline-supplementary-material-25.pdf]

Supplementary Figure 10

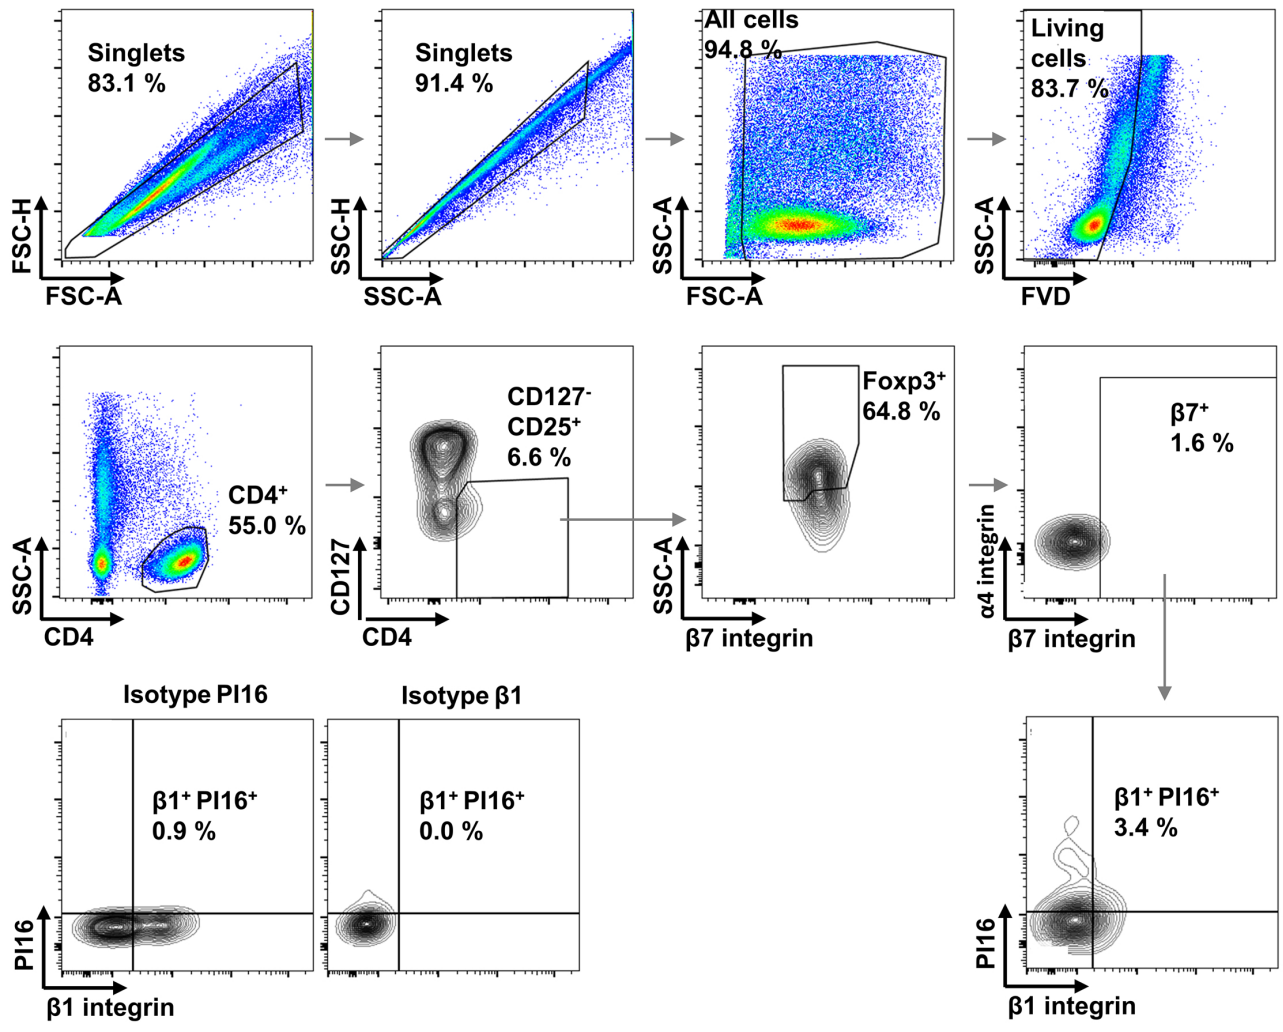

**Supplementary Figure 10: Representative gating on CD4<sup>+</sup>CD25<sup>+</sup>CD127<sup>-</sup>Foxp3<sup>+</sup>β7<sup>+</sup> β1<sup>+</sup>PI16<sup>+</sup> T<sub>Reg</sub> cells in the lamina propria.**

Following doublet exclusion and gating on vital cells based on forward and sideward scatter and Fixable viability Dye (FVD), we selected CD4<sup>+</sup> T cells and defined T<sub>Reg</sub> cells as CD25<sup>+</sup>CD127<sup>low</sup>Foxp3<sup>+</sup>. Next we gated on β7<sup>+</sup> cells and determined β1<sup>+</sup>PI16<sup>+</sup> and β1<sup>-</sup>PI16<sup>-</sup> cells in this subset (controls shown).
