# Supplementary material
Source: HighWire-hosted journal article supplement (https://gut.bmj.com/content/71/8/1551)
Supplement: inline-supplementary-material-27 [file inline-supplementary-material-27.pdf]

Supplementary Table 11: Patient information for Figure 9 B+C

|                                 |                            | CD         | UC         |
|---------------------------------|----------------------------|------------|------------|
| <b>Number Patients</b>          |                            | 15         | 10         |
| <b>Number Samples</b>           |                            | 20         | 10         |
| <b>Age (Ø, range)</b>           |                            | 36 (18-59) | 41 (22-62) |
| <b>Female [%]</b>               |                            | 60.0       | 30.0       |
| <b>HBI (Ø, range)</b>           |                            | 9 (2-22)   |            |
| <b>Mayo c.s. (Ø, range)</b>     |                            |            | 5.6 (1-11) |
| <b>Therapy [%]</b>              | <i>Aminosalisylates</i>    | 15.0       | 50.0       |
|                                 | <i>Steroids</i>            | 35.0       | 30.0       |
|                                 | <i>Immunosuppressants</i>  | 10.0       | 0.0        |
|                                 | <i>Anti-TNF antibodies</i> | 30.0       | 10.0       |
|                                 | <i>Vedolizumab</i>         | 55.0       | 70.0       |
|                                 | <i>Ustekinumab</i>         | 0.0        | 0.0        |
| <b>Disease localization [%]</b> |                            | L1: 20.0   | E1: 30.0   |
|                                 |                            | L2: 0.0    | E2: 0.0    |
|                                 |                            | L3: 45.0   | E3: 70.0   |
|                                 |                            | L4: 0.0    |            |
|                                 |                            | L4+: 35.0  |            |
